# Supplementary material
Source: publisher figshare collection journal article supplement (https://gsapubs.figshare.com/articles/dataset/_/13315613)
Supplement: Supplementary file 3 [file 2]

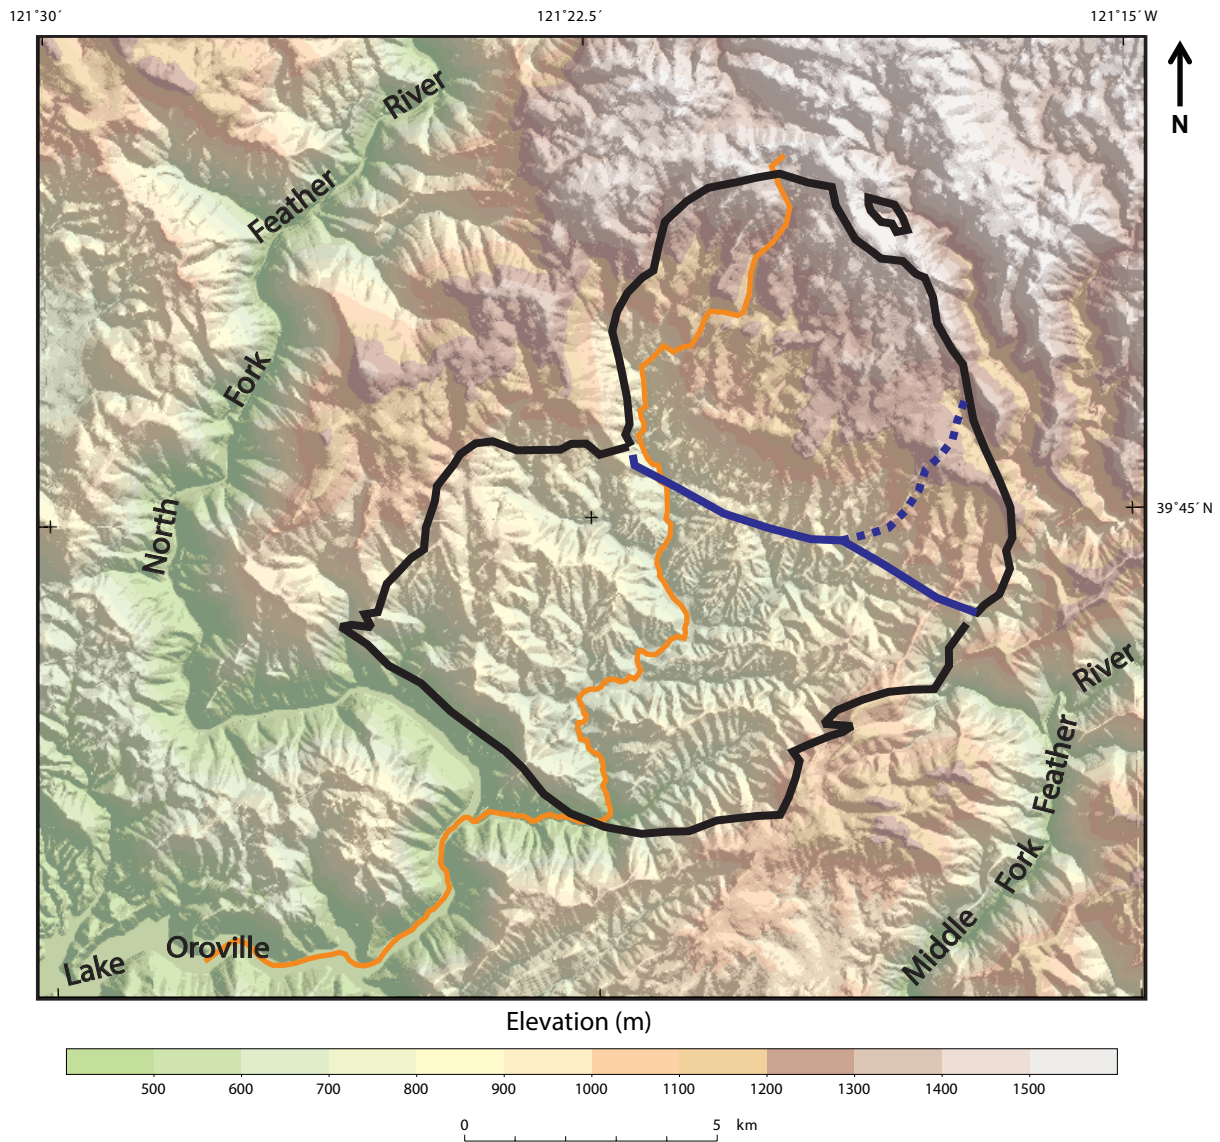

A) topography

B) 100 m local relief

C) ruggedness

D)  $DEV_{max}$

E) drainage with chi values

F) 100 m local relief with knickpoints

Figure 9.
