# Supplementary material
Source: publisher figshare collection journal article supplement (https://gsapubs.figshare.com/articles/dataset/_/13315613)

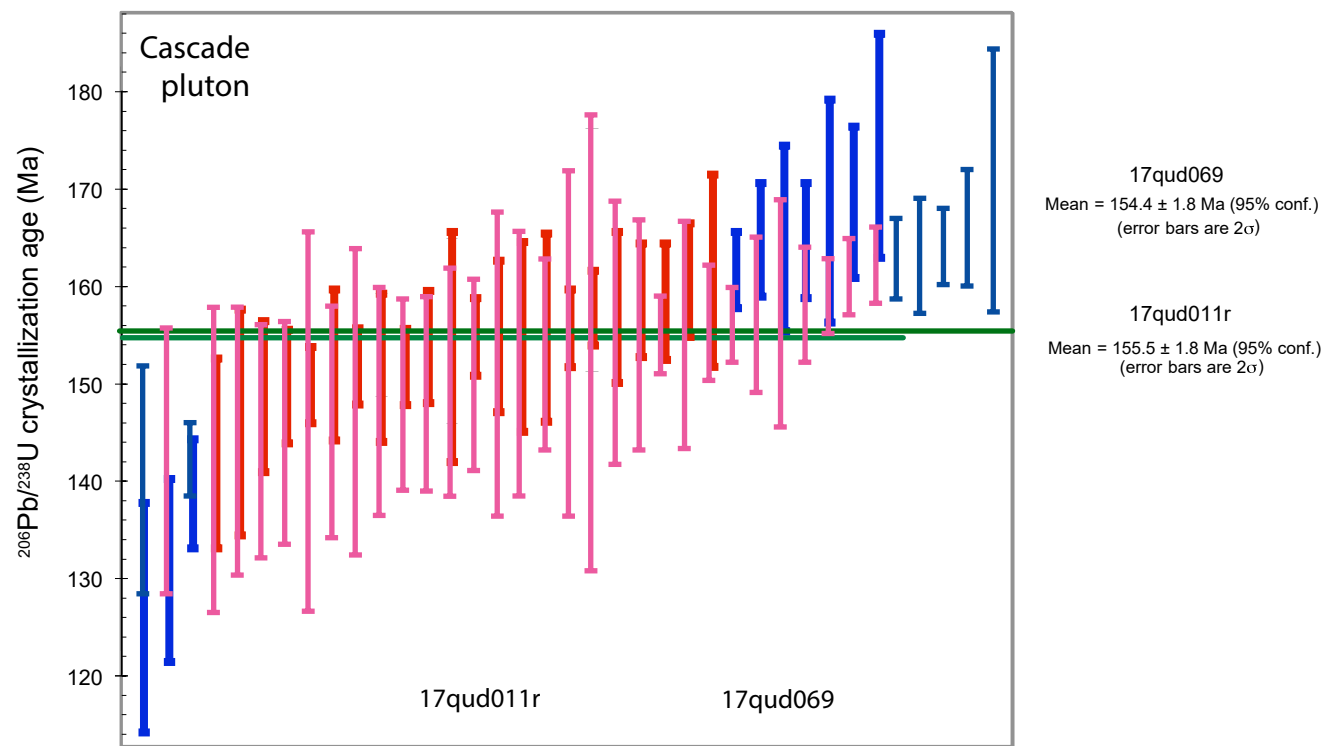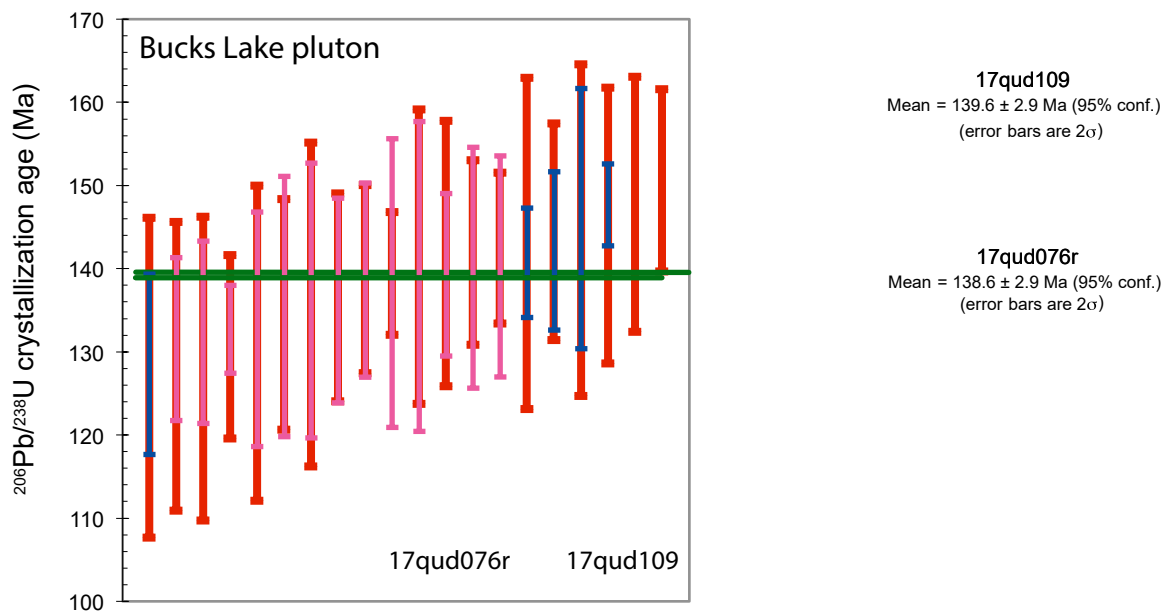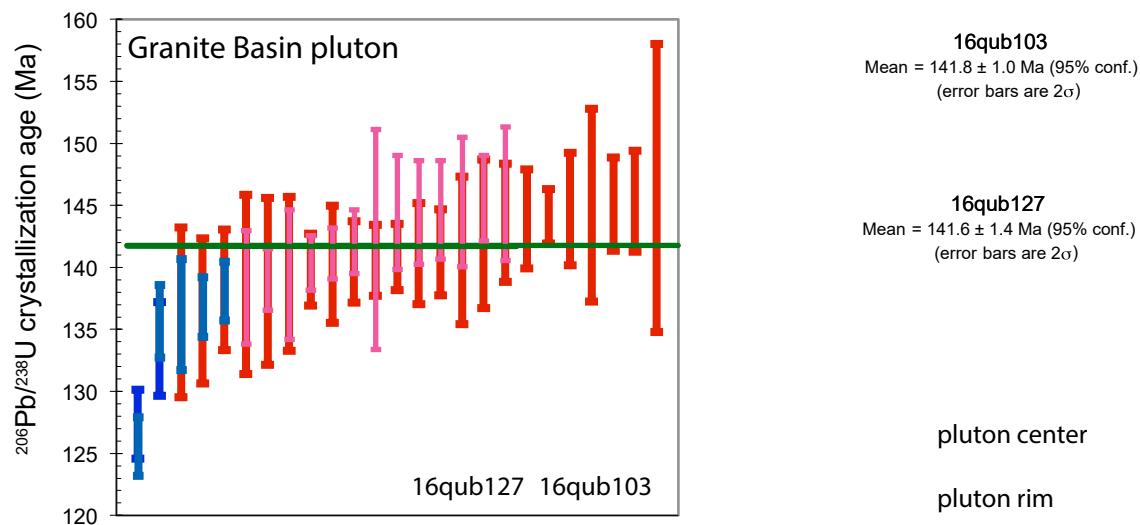

Figure 7c.

Supplement: Supplementary file 1 [file 2]

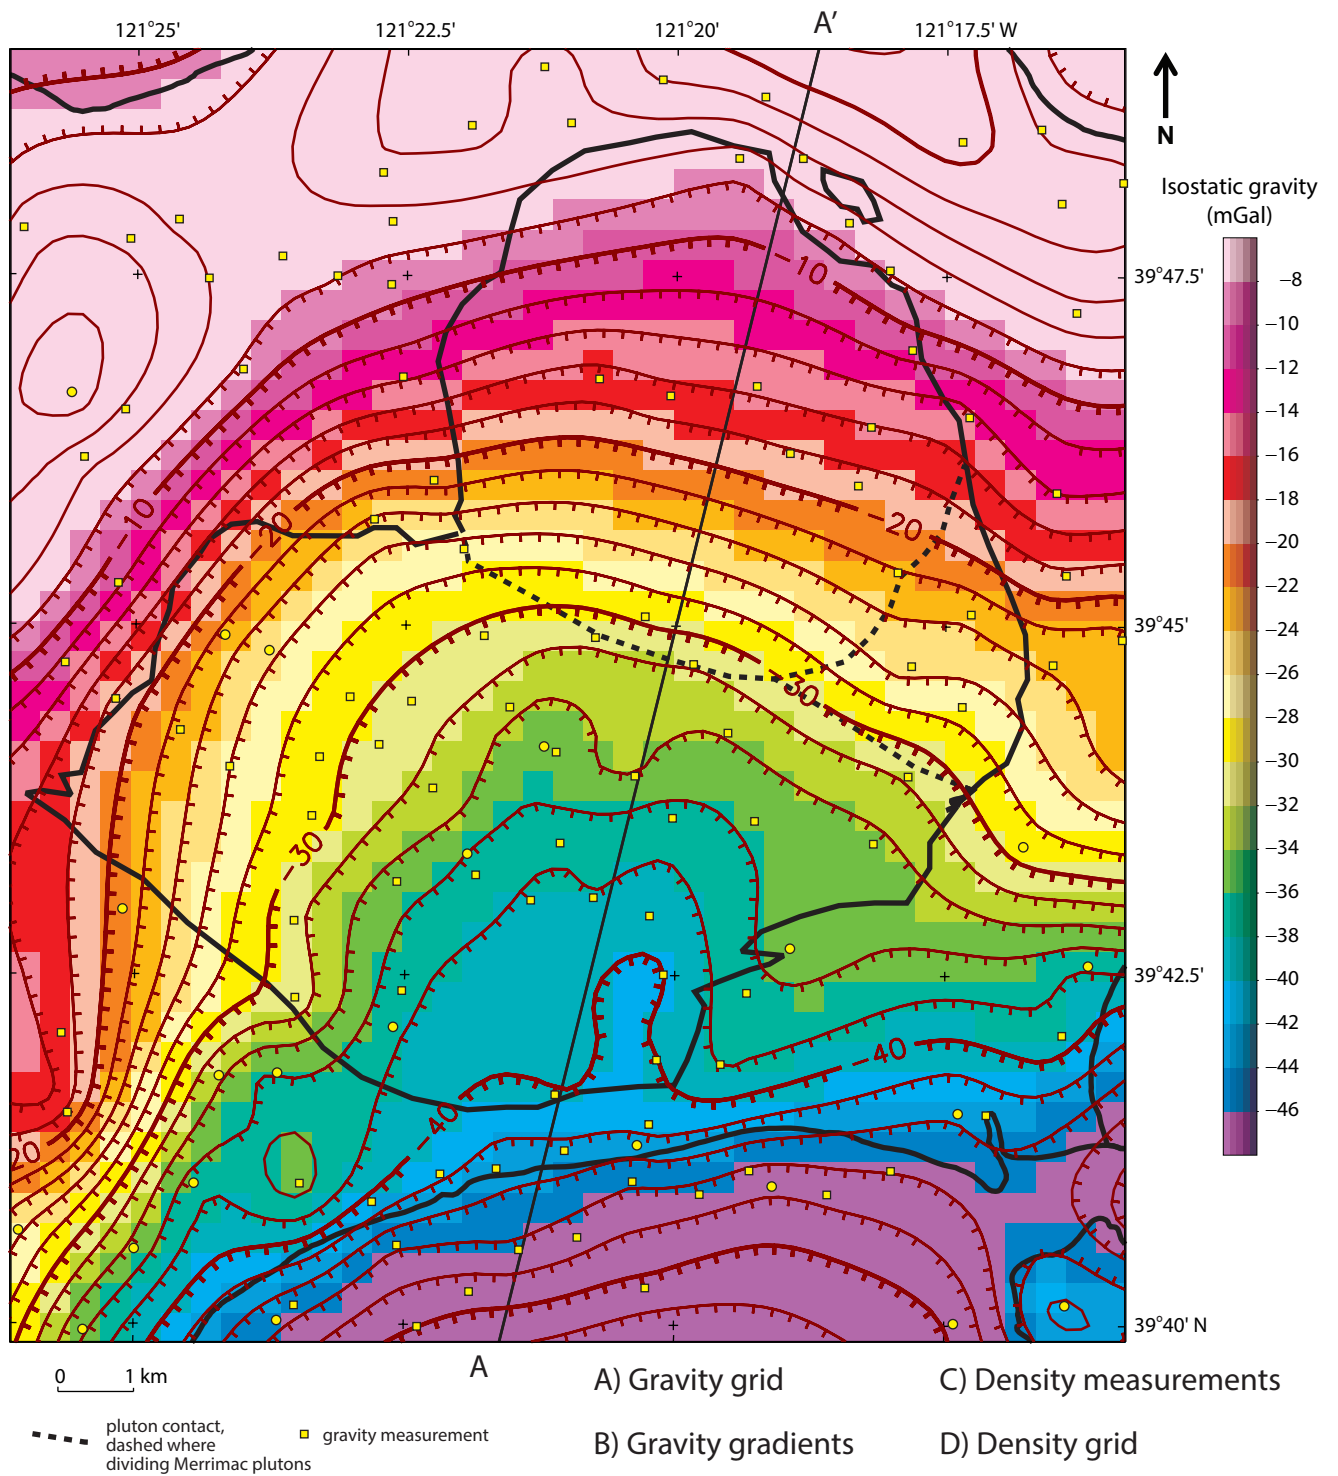

Supplement: Supplementary file 2 [file 2]

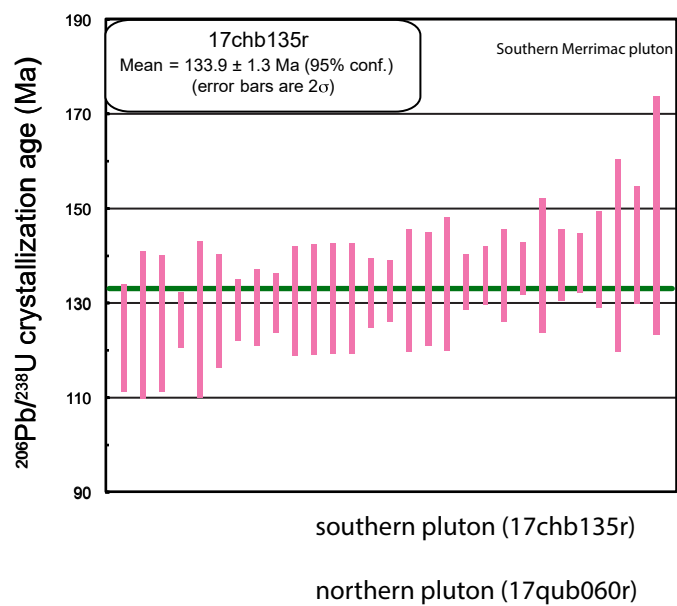

Figure 7a.

Supplement: Supplementary file 4 [file 2]

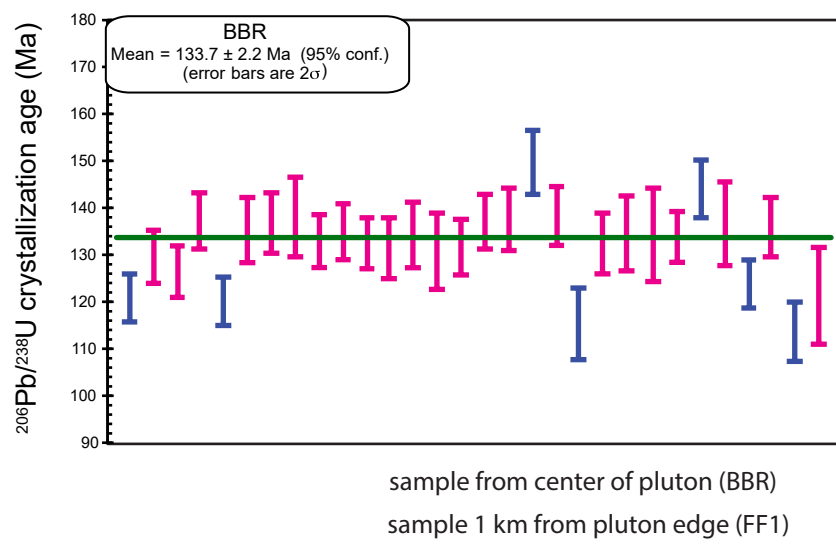

Figure 7b.

Supplement: Supplementary file 6 [file 2]

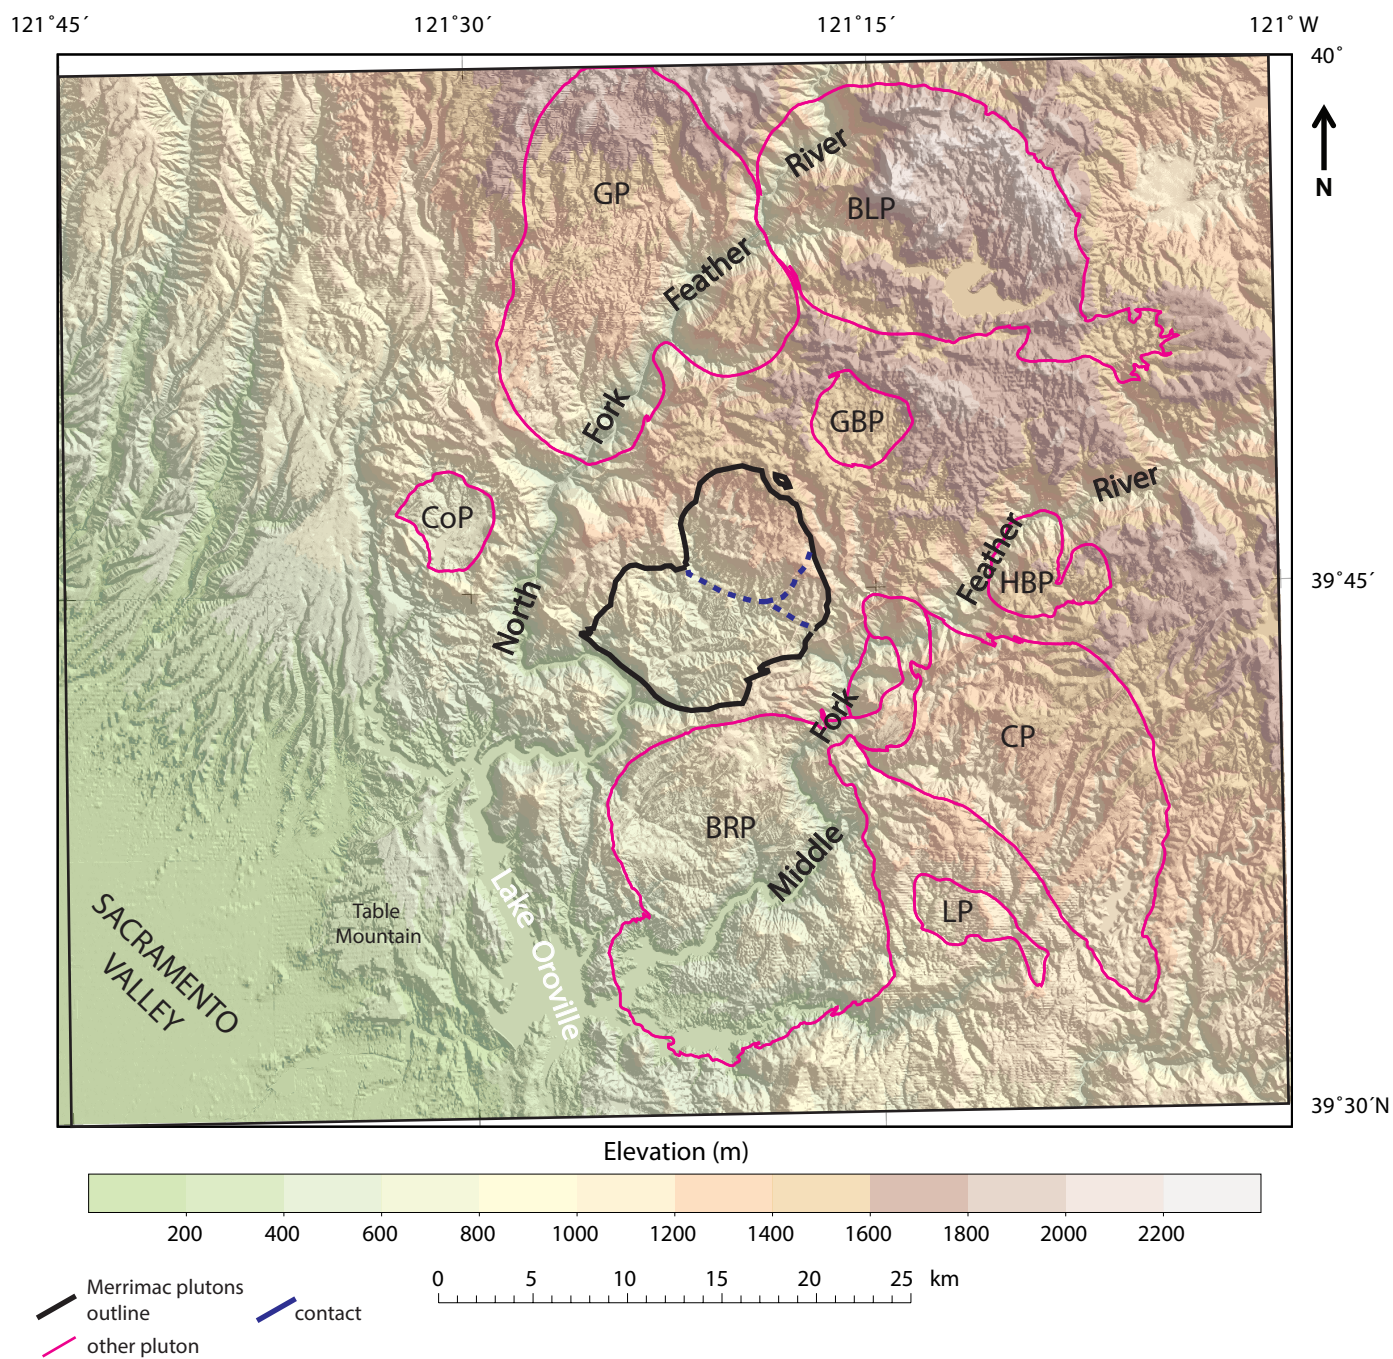

A) Topography

B) Ruggedness

C)  $DEV_{max}$

D) Faults

Figure 13.

Supplement: Supplementary file 7 [file 2]

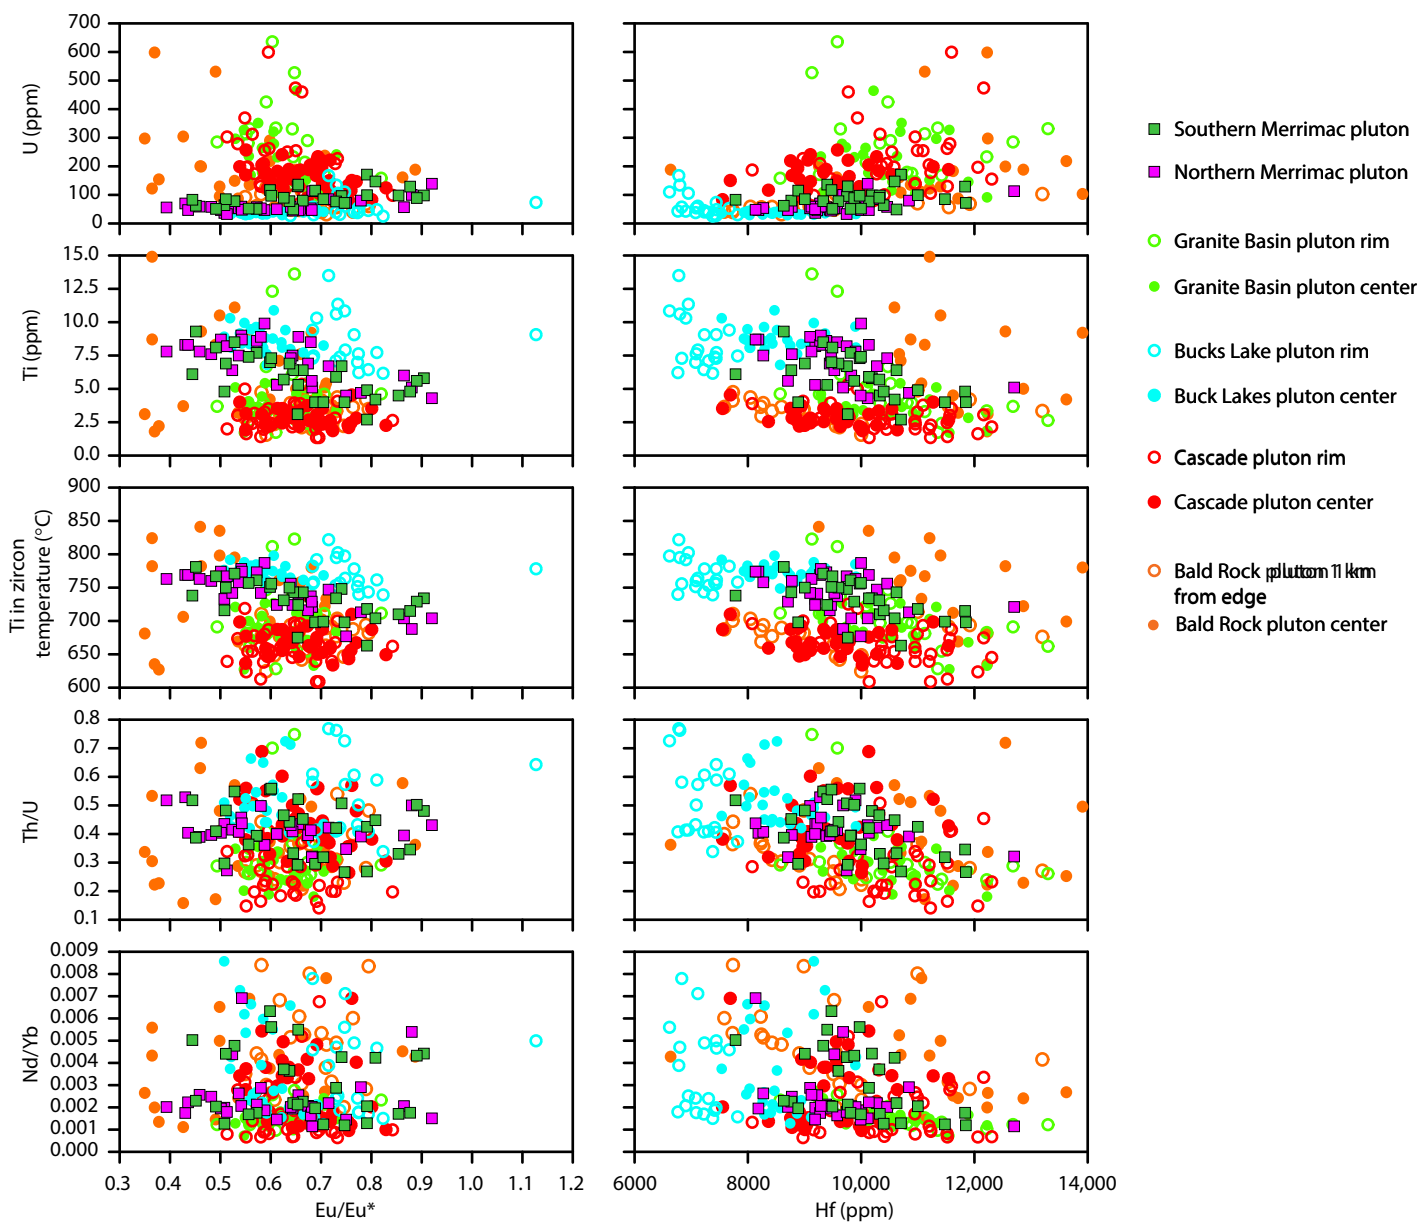

Figure 8.

Supplement: Supplementary file 8 [file 2]

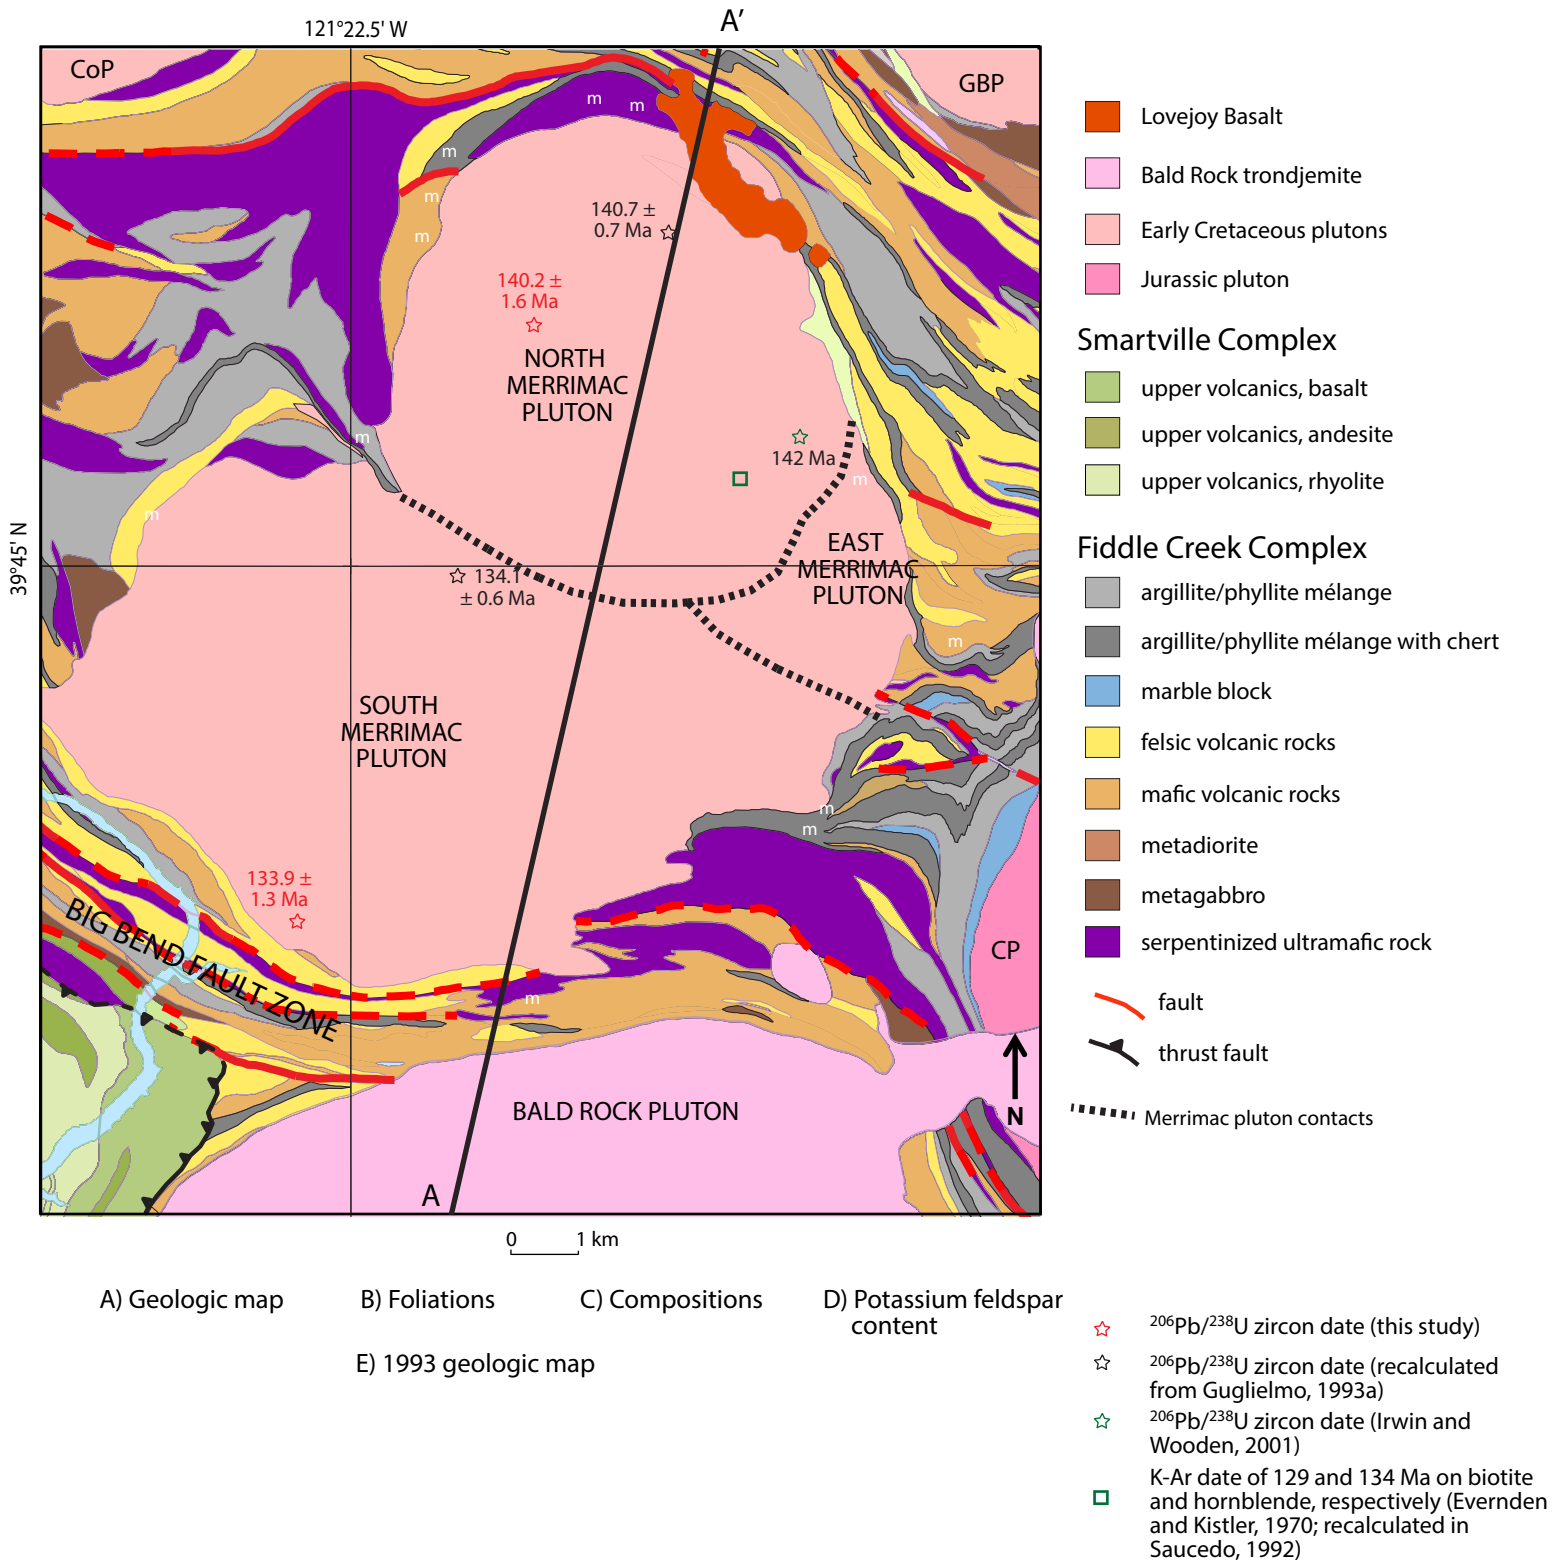

Figure 3. Geologic map of the Merrimac plutons.

Supplement: Supplementary file 9 [file 2]

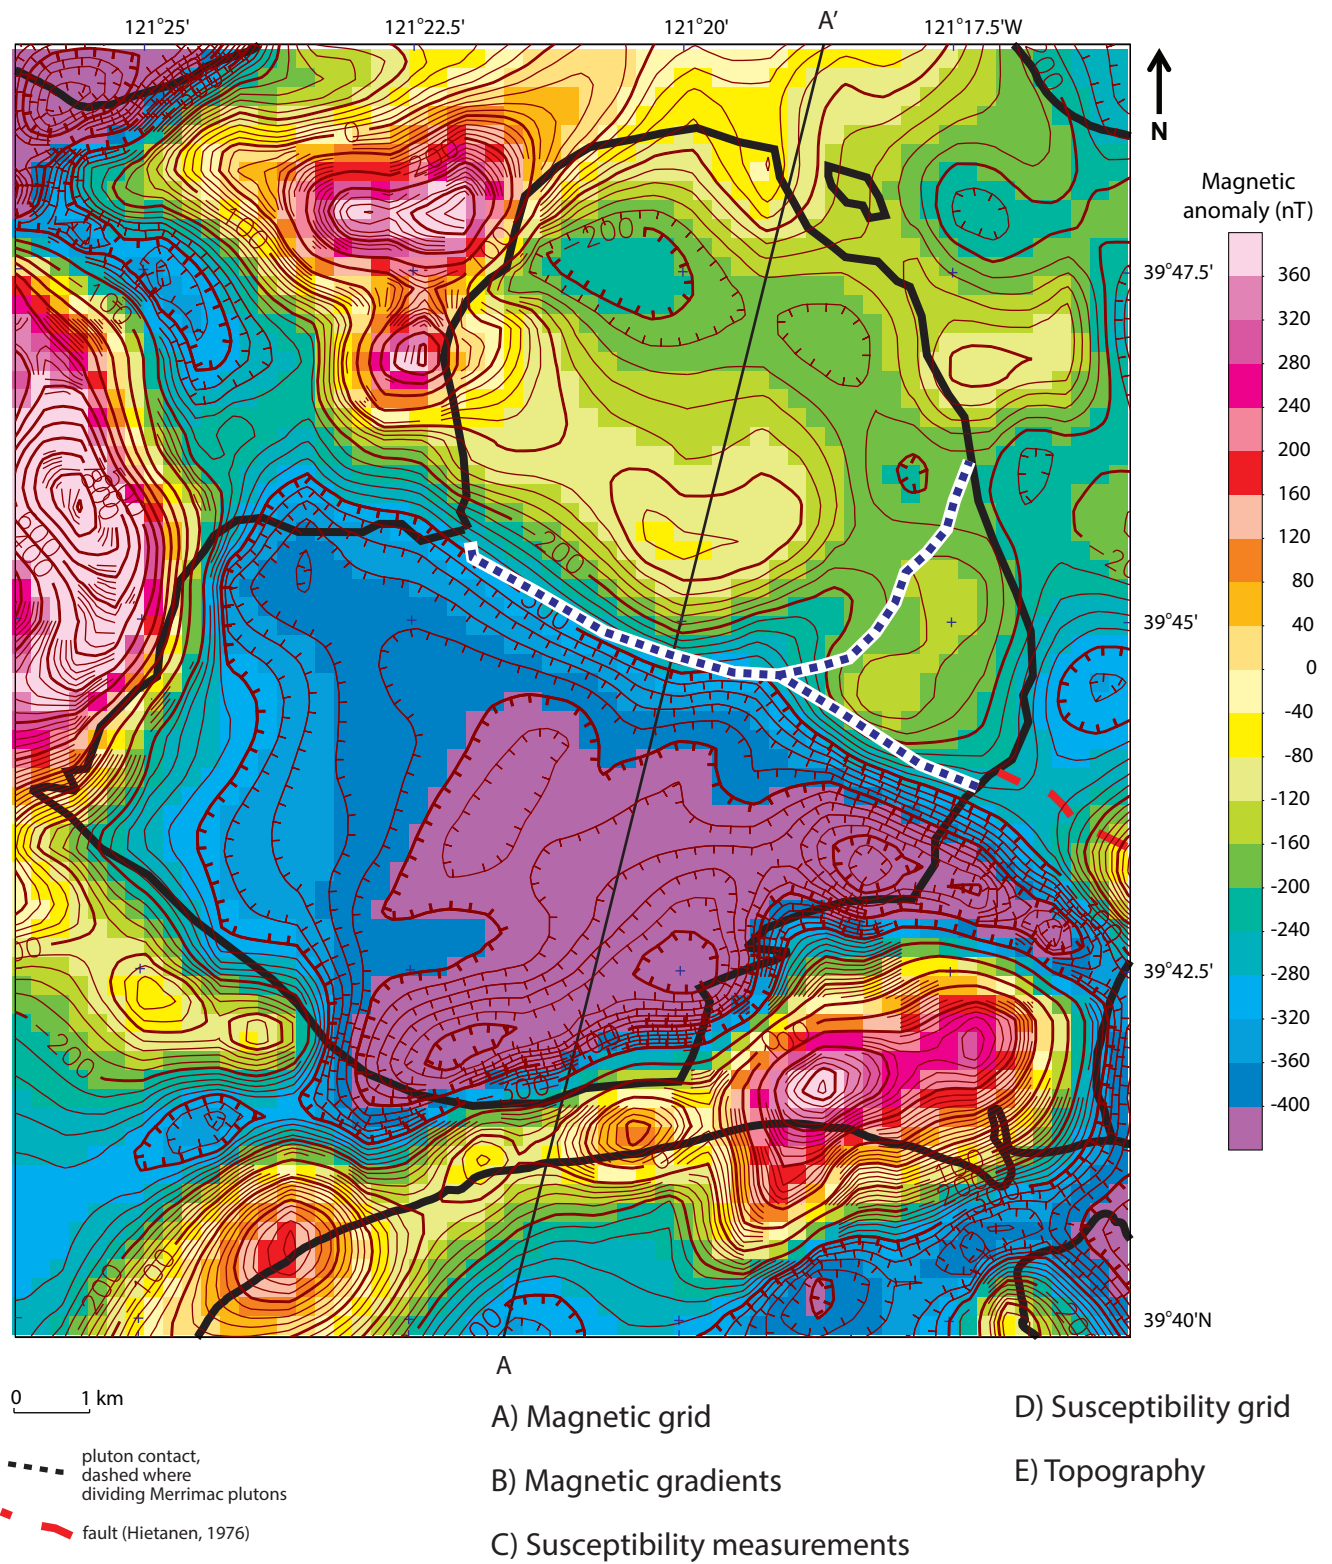

Figure 5.

Supplement: Supplementary file 10 [file 2]
